# Supplementary material
Source: PubMed Central journal article supplement (PMC4066205)

**SUPPLEMENTAL MATERIAL**

**Supplemental Table 1.** Characteristics of the chromosome 11p11.2 regions sequenced in this study.

|               | Start position (bp) | End position (bp) | Total region size (kb) | Total sequenced (kb) | $N_{\text{Variants}}$ | Coverage (Read depth) |         |
|---------------|---------------------|-------------------|------------------------|----------------------|-----------------------|-----------------------|---------|
|               |                     |                   |                        |                      |                       | Mean (SD)             | Range   |
| <i>ACP2</i>   | 47217501            | 47227099          | 9.60                   | 1.20                 | 51                    | 37.50 (18.31)         | 10 - 81 |
| <i>NR1H3</i>  | 47227100            | 47247262          | 20.16                  | 1.40                 | 66                    | 43.58 (20.08)         | 10 - 88 |
| <i>MADD</i>   | 47246227            | 47309761          | 63.53                  | 6.40                 | 271                   | 38.64 (35.00)         | 10 - 91 |
| <i>MYBPC3</i> | 47309354            | 47331966          | 22.61                  | 2.20                 | 67                    | 35.58 (19.28)         | 10 - 79 |
| <i>SPI1</i>   | 47332576            | 47379797          | 47.22                  | 4.88                 | 198                   | 37.66 (18.50)         | 10 - 90 |
| <b>Total</b>  |                     |                   | 163.13                 | 16.08                | 653                   | 38.44 (19.33)         | 10 - 91 |

**Supplemental Table 2.** Description of variation in the 5 genes at the MADD locus (ACP2, NR1H3, MADD, MYBPC3, SPI1) from RegulomeDB (PMID 22955989).

| Prediction Scores                      | ACP2          | NR1H3          | MADD            | MYBPC3         | SPI1            | Total            |
|----------------------------------------|---------------|----------------|-----------------|----------------|-----------------|------------------|
| 1a                                     | -             | -              | 0 (1)           | -              | -               | 0 (1)            |
| 1b                                     | 0 (1)         | -              | 0 (2)           | 0 (1)          | 0 (2)           | 0 (6)            |
| 1c                                     | -             | -              | -               | -              | -               | -                |
| 1d                                     | -             | -              | -               | -              | -               | -                |
| 1e                                     | -             | -              | -               | -              | -               | -                |
| 1f                                     | 1 (2)         | 0 (2)          | 0 (12)          | 0 (7)          | 0 (16)          | 1 (39)           |
| 2a                                     | -             | 2 (0)          | 1 (0)           | -              | -               | 3 (0)            |
| 2b                                     | 6 (1)         | 5 (1)          | 16 (2)          | 0 (1)          | 16 (1)          | 43 (6)           |
| 2c                                     | -             | -              | -               | -              | -               | -                |
| 3a                                     | 4 (0)         | -              | 9 (2)           | -              | 1 (0)           | 14 (2)           |
| 3b                                     | -             | -              | -               | -              | -               | -                |
| <b>Total (Prediction Scores 1-3) *</b> | <b>11 (4)</b> | <b>7 (3)</b>   | <b>26 (19)</b>  | <b>0 (9)</b>   | <b>17 (19)</b>  | <b>61 (54)</b>   |
| 4                                      | 12 (0)        | 21 (5)         | 31 (3)          | 12 (1)         | 40 (2)          | 116 (11)         |
| 5                                      | 3 (1)         | 10 (0)         | 93 (9)          | 43 (0)         | 77 (7)          | 226 (55)         |
| 6                                      | 7 (3)         | 6 (4)          | 36 (13)         | -              | 6 (6)           | 55 (26)          |
| 7                                      | 9 (1)         | 9 (1)          | 40 (1)          | 2 (0)          | 19 (5)          | 79 (8)           |
| <b>Total (All)</b>                     | <b>42 (9)</b> | <b>53 (13)</b> | <b>226 (45)</b> | <b>57 (10)</b> | <b>159 (39)</b> | <b>537 (116)</b> |

The number of common variants is indicated in parentheses

**Annotation Prediction Score Definitions based on RegulomeDB (PMID 22955989)**

1a = eQTL + TF binding + matched TF motif + matched DNase Footprint + DNase peak

1b = eQTL + TF binding + any motif + DNase Footprint + DNase peak

1c = eQTL + TF binding + matched TF motif + DNase peak

1d = eQTL + TF binding + any motif + DNase peak

1e = eQTL + TF binding + matched TF motif

1f = eQTL + TF binding / DNase peak

2a = TF binding + matched TF motif + matched DNase Footprint + DNase peak

2b = TF binding + any motif + DNase Footprint + DNase peak

2c = TF binding + matched TF motif + DNase peak

3a = TF binding + any motif + DNase peak

3b = TF binding + matched TF motif

4 = TF binding + DNase peak

5 = TF binding or DNase peak

6 = other

7 = N/A

\* Prediction Scores 1-3 were used in secondary analysis

**Supplemental Table 3.** Contribution of signals from 53<sup>\*</sup> rare variants in *NRIH3* to the overall SKAT test for association with fasting insulin

| position (hg18) | Allele <sup>†</sup> | MAF     | $\beta$ | se    | p-value ‡ | Weighted Score § | rs         | Annotation Prediction Score | % Test Contribution |
|-----------------|---------------------|---------|---------|-------|-----------|------------------|------------|-----------------------------|---------------------|
| chr11:47231478  | C/T                 | 0.00170 | 0.326   | 0.145 | 0.024     | 9.854            |            | 6                           | 23.335              |
| chr11:47227430  | G/A                 | 0.00068 | 0.766   | 0.235 | 0.001     | 8.673            |            | 2a#                         | 20.537              |
| chr11:47238495  | T/C                 | 0.00283 | 0.148   | 0.092 | 0.107     | 7.994            | rs35378256 | 6                           | 18.931              |
| chr11:47237300  | C/A                 | 0.00144 | 0.334   | 0.164 | 0.042     | 4.985            |            | 4                           | 11.806              |
| chr11:47238607  | G/A                 | 0.00044 | 1.134   | 0.411 | 0.006     | 1.069            |            | 6                           | 2.531               |
| chr11:47243026  | A/G                 | 0.00026 | 1.609   | 0.612 | 0.009     | 0.968            |            | 7                           | 2.293               |
| chr11:47243029  | T/A                 | 0.00026 | 1.609   | 0.612 | 0.009     | 0.968            |            | 7                           | 2.293               |
| chr11:47235672  | C/T                 | 0.00174 | -0.176  | 0.146 | 0.227     | 0.805            | rs41275184 | 4                           | 1.906               |
| chr11:47242802  | A/T                 | 0.00025 | -1.447  | 0.612 | 0.018     | 0.783            |            | 5                           | 1.854               |
| chr11:47242749  | C/T                 | 0.00025 | -1.335  | 0.612 | 0.029     | 0.667            |            | 5                           | 1.580               |
| chr11:47238498  | C/T                 | 0.00044 | 0.724   | 0.411 | 0.078     | 0.436            |            | 6                           | 1.033               |
| chr11:47237171  | G/A                 | 0.00039 | -0.563  | 0.325 | 0.084     | 0.419            |            | 7                           | 0.993               |
| chr11:47227397  | G/A                 | 0.00025 | -1.000  | 0.612 | 0.103     | 0.374            |            | 4                           | 0.885               |
| chr11:47237296  | C/T                 | 0.00025 | -0.995  | 0.612 | 0.104     | 0.370            |            | 4                           | 0.877               |
| chr11:47231637  | G/A                 | 0.00025 | -0.985  | 0.612 | 0.108     | 0.363            |            | 5                           | 0.860               |
| chr11:47231692  | G/A                 | 0.00025 | -0.985  | 0.612 | 0.108     | 0.363            |            | 5                           | 0.860               |
| chr11:47227354  | C/A                 | 0.00077 | -0.367  | 0.325 | 0.259     | 0.356            |            | 4                           | 0.842               |
| chr11:47237380  | C/T                 | 0.00027 | 0.950   | 0.612 | 0.121     | 0.337            |            | 2b                          | 0.799               |
| chr11:47237267  | G/A                 | 0.00046 | 0.551   | 0.612 | 0.368     | 0.337            |            | 5                           | 0.799               |
| chr11:47235622  | A/G                 | 0.00029 | 0.924   | 0.612 | 0.131     | 0.319            |            | 2b                          | 0.756               |
| chr11:47237288  | A/G                 | 0.00030 | 0.300   | 0.287 | 0.296     | 0.305            |            | 4                           | 0.722               |
| chr11:47242919  | C/T                 | 0.00025 | 0.880   | 0.612 | 0.151     | 0.290            |            | 5                           | 0.686               |
| chr11:47231623  | A/G                 | 0.00025 | 0.878   | 0.612 | 0.152     | 0.288            |            | 5                           | 0.683               |
| chr11:47238688  | G/A                 | 0.00034 | 0.318   | 0.341 | 0.351     | 0.243            |            | 7                           | 0.575               |
| chr11:47227386  | C/T                 | 0.00025 | 0.610   | 0.612 | 0.319     | 0.139            |            | 4                           | 0.329               |
| chr11:47235352  | G/C                 | 0.00027 | -0.529  | 0.612 | 0.388     | 0.105            |            | 2b                          | 0.248               |
| chr11:47238509  | A/G                 | 0.00044 | 0.347   | 0.411 | 0.398     | 0.100            |            | 7                           | 0.237               |
| chr11:47242705  | C/T                 | 0.00039 | -0.181  | 0.325 | 0.578     | 0.043            |            | 5                           | 0.103               |
| chr11:47231581  | G/T                 | 0.00044 | -0.225  | 0.411 | 0.585     | 0.042            |            | 7                           | 0.099               |
| chr11:47227243  | G/A                 | 0.00025 | -0.318  | 0.612 | 0.603     | 0.038            |            | 2a                          | 0.090               |
| chr11:47235510  | C/T                 | 0.00039 | -0.165  | 0.325 | 0.612     | 0.036            |            | 4                           | 0.086               |
| chr11:47233190  | C/T                 | 0.00025 | 0.294   | 0.612 | 0.632     | 0.032            |            | 2b                          | 0.076               |
| chr11:47238554  | G/A                 | 0.00039 | -0.153  | 0.325 | 0.638     | 0.031            |            | 6                           | 0.074               |
| chr11:47231746  | G/A                 | 0.00025 | 0.217   | 0.612 | 0.723     | 0.018            |            | 4                           | 0.042               |
| chr11:47227493  | C/A                 | 0.00045 | 0.142   | 0.411 | 0.730     | 0.017            |            | 2b                          | 0.040               |
| chr11:47237388  | T/A                 | 0.00030 | 0.207   | 0.612 | 0.736     | 0.016            |            | 4                           | 0.038               |
| chr11:47237216  | T/C                 | 0.00025 | 0.159   | 0.612 | 0.795     | 0.009            |            | 7                           | 0.022               |
| chr11:47227412  | G/A                 | 0.00025 | 0.158   | 0.612 | 0.796     | 0.009            |            | 4                           | 0.022               |
| chr11:47231524  | C/T                 | 0.00025 | 0.138   | 0.612 | 0.822     | 0.007            |            | 6                           | 0.017               |
| chr11:47238699  | C/T                 | 0.00046 | -0.079  | 0.411 | 0.847     | 0.005            |            | 7                           | 0.012               |
| chr11:47235669  | C/T                 | 0.00043 | -0.056  | 0.325 | 0.862     | 0.004            |            | 4                           | 0.010               |
| chr11:47237290  | C/T                 | 0.00044 | -0.063  | 0.411 | 0.878     | 0.003            |            | 4                           | 0.008               |
| chr11:47238524  | T/C                 | 0.00025 | 0.062   | 0.612 | 0.919     | 0.001            |            | 7                           | 0.003               |
| chr11:47231720  | T/C                 | 0.00025 | 0.051   | 0.612 | 0.933     | 0.001            |            | 5                           | 0.002               |
| chr11:47227423  | A/C                 | 0.00025 | -0.050  | 0.612 | 0.935     | 0.001            |            | 4                           | 0.002               |
| chr11:47233300  | C/T                 | 0.00025 | -0.044  | 0.612 | 0.943     | 0.001            |            | 4                           | 0.002               |
| chr11:47233378  | C/T                 | 0.00039 | -0.015  | 0.325 | 0.963     | 0.000            |            | 4                           | 0.001               |

<sup>\*</sup> 6 variants were found to be monomorphic in the current sample

<sup>†</sup> The first one is the tested allele, and the second one is the other allele.

<sup>‡</sup> P-value for single snp

<sup>§</sup> Q statistic from meta SKAT analysis

<sup>||</sup> RegulomeDB Score

# chr11:47227430 is additionally predicted to lie in a FOXA1 transcription factor site binding motif

**Annotation Prediction Score Definitions:**

2a = TF binding + matched TF motif + matched DNase Footprint + DNase peak

2b = TF binding + any motif + DNase Footprint + DNase peak

4 = TF binding + DNase peak

5 = TF binding or DNase peak

6 = other

7 = N/A

**Supplemental Table 4.** Common variants meta-analysis results for ARIC, CHS and FHS. Results are shown for known associations with fasting glucose and fasting pro-insulin at independent SNPs identified by Dupuis *et al.*<sup>1</sup> (rs7944584) and Strawbridge *et al.*<sup>4</sup> (rs10838687).

| Gene | rs #       | Alleles * | MAF   | Original Phenotype(s) | Fasting Insulin |       |         |       |                |                  |                               | Fasting Glucose |       |         |       |                |                  |                               | Reference                     |
|------|------------|-----------|-------|-----------------------|-----------------|-------|---------|-------|----------------|------------------|-------------------------------|-----------------|-------|---------|-------|----------------|------------------|-------------------------------|-------------------------------|
|      |            |           |       |                       | Meta            |       |         | Q     | I <sup>2</sup> | P <sub>het</sub> | Direction<br>(ARIC, CHS, FHS) | Meta            |       |         | Q     | I <sup>2</sup> | P <sub>het</sub> | Direction<br>(ARIC, CHS, FHS) |                               |
|      |            |           |       |                       | β               | se    | p-value |       |                |                  |                               | β               | se    | p-value |       |                |                  |                               |                               |
| MADD | rs10838687 | G/C       | 0.194 | fasting proinsulin    | -0.014          | 0.016 | 0.321   | 0.630 | 0.000          | 0.428            | ?+                            | -0.005          | 0.022 | 0.714   | 0.467 | 0.000          | 0.494            | ?+                            | <a href="#">PMID:21873549</a> |
|      | rs7944584  | T/G       | 0.278 | fasting glucose       | -0.001          | 0.013 | 0.480   | 1.268 | 0.000          | 0.530            | -+-                           | -0.038          | 0.014 | 0.054   | 0.022 | 0.000          | 0.989            | ---                           | <a href="#">PMID:20081858</a> |

The β's and se's are from the analysis that accounts for sampling weights; p-value is from the unweighted analysis.

\* The first allele is the risk allele, and the second is the other allele.

significance level =  $\alpha = 0.05$

Q = Cochran's Q test (assessing whether a variant across studies is homogeneous).

I<sup>2</sup> = I squared Index

P<sub>het</sub> = p-value of heterogeneity

**Supplemental Table 5.** Sequences of oligonucleotides used in functional studies.

| Assay                     | Name                              | Forward strand                                          | Reverse strand                                         |
|---------------------------|-----------------------------------|---------------------------------------------------------|--------------------------------------------------------|
| EMSA                      | Non-specific oligonucleotide (NS) | 5'-TTACTTCACACTTTAATAAA-3'                              | 5'-TTTATTAAGTGTGAAGTAA-3'                              |
| EMSA                      | chr11:47227430-G                  | 5'GGTGCAGGACACAGTATGTAAACAACCCCTTGGAC-3'                | 5'-GTCCAAAGGGTGTTCACATACTGTGCCTGCACC-3'                |
| EMSA                      | chr11:47227430-A                  | 5'-GGTGCAGGACACAGTATATAAACAACCCCTTGGAC-3'               | 5'-GTCCAAAGGGTGTTCATATACTGTGCCTGCACC-3'                |
| EMSA and Luciferase assay | Consensus FoxA1 oligonucleotide   | 5'-GCTCCAGGGAATGTTTGTCTTAAATACCATC-3'                   | 5'-CGAGGTCCCTTACAAACAAGAATTTATGGTAG-3'                 |
| Luciferase assay          | 280mer-PCR                        | 5'-AAAAACTCGAGGATCGGGTGCAGAATTGAGG-3'                   | 5'-TTTTTGGATCCGTGGAGGGGAGGGAGGA-3'                     |
| Luciferase assay          | Over-lapping-PCR                  | 5'-GACACAGTATATAAACAACCCCTTG-3'                         | 5'-CAAAGGGTGTTCATATACTGTGC-3'                          |
| Luciferase assay          | 40mer- chr11:47227430-G           | 5'/5Phos/AGCTTGGTGCAGGACACAGTATGTAAACAACCCCTTGGAC-3'    | 5'- /5Phos/GATCC GTCCAAAGGGTGTTCACATACTGTGCCTGCACC -3' |
| Luciferase assay          | 40mer- chr11:47227430-A           | 5'- /5Phos/AGCTTGGTGCAGGACACAGTATATAAACAACCCCTTGGAC -3' | 5'- /5Phos/GATCC GTCCAAAGGGTGTTCATATACTGTGCCTGCACC -3' |

**Supplemental Figure 1:** Regional plots for association of fasting glucose with 116 common variants at the chromosome 11p11.2 locus (*ACP2*, *NR1H3*, *MADD*, *MYBPC3* and *SPI1*). The  $-\log_{10} p$ -value of variant associations are plotted on the upper y-axis versus chromosomal location on the x-axis (NCBI Genome Build 36). The two variants shown as blue circles are known from GWAS to be associated with fasting glucose (*rs7944584*)<sup>1</sup> or fasting proinsulin (*rs10838687*)<sup>2</sup>. Green bars at the bottom of the graph represent the location of the five 11p11.2 locus genes in the region.

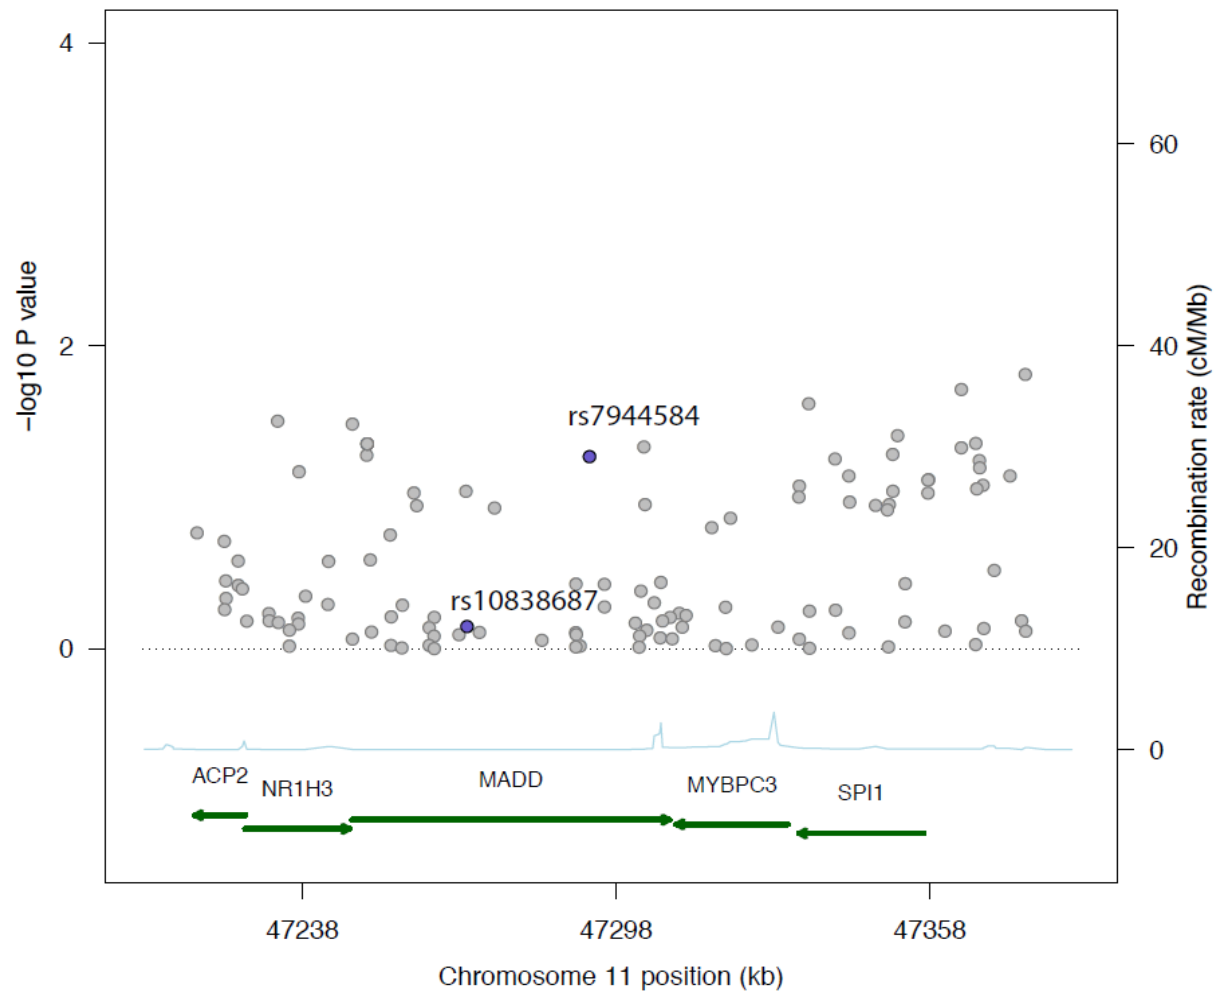

Supplement: NIHMS580997-supplement-Supplemental_Material.pdf [file NIHMS580997-supplement-Supplemental_Material.pdf]
